# Supplementary material
Source: publisher site journal article supplement (https://www.dovepress.com/article/422095)
Supplement: Supplementary file 1 [file get_supplementary_file.php]

**Supplementary Table 1: Demographic data and clinical parameters.**

| Variables | Mild | Severe |
| --- | --- | --- |
| N | 70 | 47 |
| Age |  |  |
| Mean (SD) | 44.10 (18.03) | 56.43 (16.99) |
| Median | 45 | 60 |
| Range (IQR) | 14.0, 77.0 | 8.0, 85.0 |
| Gender, n (%) |  |  |
| Female | 27 (38.57%) | 15 (31.9%) |
| Male | 43 (61.42%) | 32 (68.08%) |
| Classification, n (%) |  |  |
| Mild/non-severe cases  (Fever, sore throat, runny nose, cough) | 70 (59.82%) | - |
| Severe cases (Septic shock, Obstructive air disease,  Severe Acute Respiratory infection,  pneumonia) | - | 47 (40.17%) |

**Footnote**: The descriptive statistics show the demographic data along with the clinical parameters showing the distribution of participants with mild and severe signs and symptoms.

**Supplementary Table 2A. Univariate analysis.**

| **Variables** | **Unadjusted Prevalence Ratio** | **95% Confidence Interval** |
| --- | --- | --- |
| **Delta Ct Value of Interferon 3** | 1.03 | (0.98, 1.08) |
| **Delta Ct Value of Interferon 4** | 0.95 | (0.89, 1.03) |
| **Viral load** | 1.00 | (0.95, 1.06) |
| ***Age (years)** | 1.02 | (1.01, 1.04) |
| **Gender**  Female (Reference)  Male | 1.19 | (0.65, 2.21) |
| **Single Nucleotide Polymorphisms in IFN3**  Wild type (Reference)  Mutant | 1.06 | (0.59, 1.92) |
| ***Single Nucleotide Polymorphisms in IFN4**  Wild type (Reference)  Mutant | 3.44 | (1.54, 7.69) |

**Footnote:** The association of demographic and genetic factors with the severity of SARS-CoV-2 infection was analyzed using univariate analysis. *p-value significant at <0.05.

**Supplementary Table 2B. Multivariate analysis.**

| ***Variables** | **Adjusted Prevalence Ratio** | **95% Confidence Interval** |
| --- | --- | --- |
| **Single Nucleotide Polymorphisms in IFN4**  Wild type (reference)  Mutant | 3.34 | (1.49, 7.47) |
| **Age (years)** | 1.02 | (1.00, 1.04) |

Footnote: The association of demographic and genetic factors with the severity of SARS-CoV-2 infection was analyzed using multivariate analysis*.* *p-value significant at <0.05.

**Supplementary Fig 1. Gel electrophoresis of Single Nucleotide Polymorphisms in IFNL3 and IFNL4 genes.** Suppl.Figure 1A shows the 3% agarose gel image of Single Nucleotide Polymorphisms of the Interferon Lambda 3 gene, where the ARMS-PCR fragments 433 and 326bp can be seen showing polymorphic genes (CT) among mild vs. severe cases of COVID-19 patients. Suppl.Figure 1B shows the 3% agarose gel image of Single Nucleotide Polymorphisms of the Interferon Lambda 4 gene, where the RFLP-PCR digested fragments 175 and 50bp can be seen showing polymorphic genes (TΔG) among mild vs severe cases of COVID-19 patients.
